1 **cDNA display coupled with next-generation sequencing for rapid activity-based**  
2 **screening: Comprehensive analysis of transglutaminase substrate preference**

3

4 **Jasmina Damnjanović<sup>1\*</sup>, Nana Odake<sup>1</sup>, Jicheng Fan<sup>1</sup>, Beixi Jia<sup>1</sup>, Takaaki Kojima<sup>1</sup>, Naoto**  
5 **Nemoto<sup>2</sup>, Kiyotaka Hitomi<sup>3</sup>, Hideo Nakano<sup>1</sup>**

6

7 <sup>1</sup>Laboratory of Molecular Biotechnology, Graduate School of Bioagricultural Sciences,  
8 Nagoya University, Furo-cho, Chikusa-ku, Nagoya 464-8601, Japan

9 <sup>2</sup>Laboratory of Evolutionary Molecular Engineering, Graduate School of Science and  
10 Engineering, Saitama University, 255 Shimo-Okubo, Sakura-ku, Saitama 338-8570, Japan

11 <sup>3</sup>Laboratory of Cellular Biochemistry, Graduate School of Pharmaceutical Sciences, Nagoya  
12 University, Furo-cho, Chikusa-ku, Nagoya 464-8601, Japan

13

14 \*To whom correspondence should be addressed:

15 Jasmina Damnjanović, Graduate School of Bioagricultural Sciences, Nagoya University, Furo-  
16 cho, Chikusa-ku, Nagoya 464-8601, Japan

17 Tel.: +81-52-789-4144; Fax: +81-52-789-4145; E-mail: [jasmina@agr.nagoya-u.ac.jp](mailto:jasmina@agr.nagoya-u.ac.jp)

18

19 Running title: Screening of transglutaminase substrate preference by cDNA display

20

21

22

## 1 **Abstract**

2 cDNA display is an *in vitro* display technology based on a covalent linkage between a  
3 protein and its corresponding mRNA/cDNA, where a stable complex is formed suitable for a  
4 wide range of selection conditions. A great advantage of cDNA display is the ability to handle  
5 enormous library size ( $10^{12}$ ) in a microtube scale, in a matter of days. To harness its benefits,  
6 we aimed at developing a platform which combines the advantages of cDNA display with high-  
7 throughput and accuracy of next-generation sequencing (NGS) for the selection of preferred  
8 substrate peptides of transglutaminase 2 (TG2), a protein cross-linking enzyme. After the  
9 optimization of the platform by the repeated screening of binary model libraries consisting of  
10 the substrate and non-substrate peptides at different ratios, screening and selection of  
11 combinatorial peptide library randomized at positions -1, +1, +2, and +3 from the glutamine  
12 residue was carried out. Enriched cDNA complexes were analyzed by NGS and bioinformatics,  
13 revealing the comprehensive amino acid preference of the TG2 at targeted positions of the  
14 peptide backbone. This is the first report on the cDNA display/NGS screening system to yield  
15 comprehensive data on TG substrate preference. Although some issues remain to be solved,  
16 this platform can be applied to the selection of other TGs and easily adjusted for the selection  
17 of other peptide substrates and even larger biomolecules.

18  
19 **Keywords:** cDNA display, transglutaminase, high-throughput screening, substrate specificity,  
20 next-generation sequencing

21

22

23

24

25

## 1 **Introduction**

2 Transglutaminases (TGs: EC 2.3.2.13) are enzymes catalyzing transamidation, a transfer  
3 reaction between an acyl donor (peptidyl glutamine) and an acyl acceptor (amino group of  
4 lysine). As a result, a stable isopeptide bond is formed, resistant to proteolytic degradation.  
5 Owing to their transamidation activity, TGs are known for their role in cross-linking of proteins  
6 and peptides. Since transamidation proceeds *via* the formation of acyl-enzyme intermediate,  
7 which is a rate-limiting step, TGs show high specificity towards acyl donors, while reacting on  
8 a variety of acyl acceptors such as lysines of proteins and peptides and even low molecular  
9 weight amines.<sup>(5)</sup>

10 The presence of TGs is vast across kingdoms of plants, animals and microorganisms,  
11 with many of them having been studied and characterized. In mammals, eight different types  
12 of TGs have been identified (TG1, TG2, TG3, TG4, TG5, TG6, TG7, and factor XIII), with  
13 functions ranging from blood clotting, epidermis and hair follicle formation, wound healing,  
14 apoptosis, extracellular matrix formation and cell adhesion.<sup>(8)</sup> Among mammalian TGs,  
15 transglutaminase 2 (TG2) is the most-studied and yet most elusive TG because of its  
16 omnipresence in cellular compartments and tissues and its multifunctionality which includes  
17 transamidase, GTPase, protein disulfide bond isomerase and protein kinase activity.<sup>(9; 30)</sup> All  
18 mammalian TGs are homologous and require calcium ion for activation. Aberrant expression  
19 and function of TGs have serious effects on human health and cause conditions such as  
20 hemorrhage, celiac disease, cancer, fibrosis, Alzheimer's and Huntington's disease, and  
21 lamellar ichthyosis.<sup>(18)</sup> Although extensively studied, more work is needed to fully understand  
22 the biological function of TGs for which sensitive and specific *in situ* detection of TG activity  
23 is desired. Artificial fluorescently labeled glutamine (Gln)-peptide probes ('Hitomi peptides'),  
24 have greatly contributed to *in vitro* and *in situ* detection and measurement of TG activity.<sup>(29; 28;</sup>  
25 <sup>33; 7; 21; 19)</sup> These probes have been developed by the selection from random peptide libraries by

1 phage display technology, and are now available for studies of TG isozymes. Up to date, these  
2 probes have not been optimized in terms of amino acid preference at Gln-surrounding positions  
3 or used to investigate TG substrate preference by protein engineering.

4 Protein engineering is an indispensable set of tools developed to tailor the protein and  
5 peptide function for specific needs. However, screening of large libraries has long been a  
6 bottleneck in terms of time, labor and cost. For example, random mutagenesis of five amino  
7 acid residues generates a diversity of  $10^6$  at an amino acid level and  $10^9$  at a nucleotide level.  
8 With six amino acid residues, the diversity increases to  $10^7$ - $10^{10}$ . Having the numbers in mind,  
9 it is easy to understand why an efficient screening system is necessary.

10 *In vitro* screening and selection methods utilize cell-free protein synthesis and various  
11 display technologies to physically link genotype and phenotype. Compared to *in vivo* methods  
12 where library size is limited by the transformation of DNA into *E. coli* or yeast, *in vitro* methods  
13 do not require transformation and thus allow for larger library size and, selection of cytotoxic  
14 proteins with less processing time. Widely used *in vitro* methods include mRNA/cDNA display,  
15 ribosome display and phage display, although phage display includes an *in vivo* step.  
16 mRNA/cDNA display was pioneered by two groups at a similar time, Roberts and Szostak's  
17 group<sup>(24)</sup> and Nemoto and Yanagawa's group<sup>(23)</sup>. This technology relies on the formation of a  
18 covalent link between the genotype, represented by mRNA/cDNA and phenotype, represented  
19 by the corresponding protein, via puromycin. The convenience of complete control of  
20 expression/screening conditions, stable genotype-phenotype linkage, incorporation of  
21 unnatural amino acids and handling of large libraries makes mRNA/cDNA display a preferred  
22 method for screening and selection in protein engineering.

23 Numerous reports exist on mRNA/cDNA display being applied to affinity-based  
24 screening and selection of peptides and antibody fragments.<sup>(2; 1; 17; 15; 22; 31)</sup> Utilization of  
25 mRNA/cDNA display for activity-based selection of enzyme substrates has been described,

1 however to a much less extent. The representative applications include analysis of substrate  
2 scope of protein-modifying enzymes in proteomics research, such as caspase using the library  
3 of the mRNA-displayed human proteome <sup>(12)</sup>, viral protease and a kinase <sup>(14)</sup>, and  
4 metalloprotease <sup>(27)</sup>. Very recently, this technology has been applied to study the substrate  
5 scope of enzymes involved in the modification of post-translationally modified peptides <sup>(6; 32)</sup>  
6 demonstrating that the substrate preference can be studied in great detail by mRNA/cDNA  
7 display. These achievements clearly show the great potential of mRNA/cDNA display for  
8 studies of other biologically and industrially relevant enzymes and their substrates. Aiming to  
9 study the substrate specificity of microbial transglutaminase (MTG) and design its artificial  
10 substrate for biotechnological applications, Lee *et al.* used mRNA display to isolate a novel  
11 Gln substrate of MTG after six rounds of screening and selection from a 10-mer random library  
12 <sup>(16)</sup>.

13 To expand the potential of mRNA display in TG-related research, we aimed to develop  
14 a cDNA display/NGS platform for comprehensive analysis of the TG substrate preference (Fig.  
15 1) which would encompass the majority of the reactive sequences rather than the best hits,  
16 enable their ranking and analysis of the consensus sequence. We also aimed to reduce the time  
17 and labor associated with multiple selection rounds and probe the sensitivity of the platform in  
18 a single selection round. For the platform development, we used TG2 and its substrate, T26  
19 peptide, previously isolated from a phage-displayed 12-mer-peptide library.<sup>(29)</sup> We first  
20 optimized *in vitro* synthesis and display of the T26 peptide and selection conditions by the  
21 repeated screening of binary model libraries consisting of T26 and non-substrate peptide T26A  
22 (Gln is replaced with Ala). In the following, our platform was deployed for screening of a T26-  
23 based random library, LibQ, with Gln randomized by NNK codon, to confirm the efficiency of  
24 the activity-based screening. In continuation, a T26-based library, Lib4, with residues at  
25 positions -1, +1, +2 and +3 from Gln randomized by NNK codon was constructed and screened

1 by our platform. By analyzing the enriched sequence data, we obtained a consensus sequence  
2 indicating the TG2 preference at randomized positions of the peptide backbone. This result  
3 demonstrates that our platform represents a time-, labor- and cost-efficient tool for  
4 comprehensive analysis of TG substrate preference and development of TG peptide probes.

5

## 6 **Results**

### 7 T26 peptide display

8 We first attempted to display T26 peptide with a C-terminal GST-tag (Fig. S1), since this  
9 construct ensured soluble production of T26 in *E.coli* cells previously <sup>(29)</sup>. However, the  
10 selection of T26-GST display from binary model libraries beyond 1:1 molar ratio of T26-GST  
11 and negative control peptide was unsuccessful (Fig. S2). The suspected reason is the  
12 aggregation propensity of the GST tag under the conditions used for mRNA display generation  
13 and manipulation (data not shown).

14 We next tested the display of the untagged T26 peptide (Fig. S1, Table S1). mRNA  
15 display (peptide-linker-mRNA complex) of untagged T26 was produced by the PURE<sub>flex</sub>  
16 system and checked for solubility. Surprisingly, the display was fully soluble and the efficiency  
17 of mRNA display synthesis proceeded with approx. 70% yield (Fig. 2), as judged by the band  
18 density of mRNA-linker complex and mRNA display complex. The untagged T26 construct  
19 (abbreviated as T26) was used in consequent experiments and for the construction of peptide  
20 libraries.

21

### 22 Generation of binary model libraries

23 Binary model libraries containing T26: T26A (non-substrate peptide) = 1:4 or 1:50 were  
24 made by mixing corresponding DNA in specified molar ratios and were used as templates for  
25 mRNA library generation. mRNA synthesis in 30- $\mu$ L scale proceeded with the overall yield of

1 29  $\mu\text{g}$  for 1:4 mRNA library and 55  $\mu\text{g}$  for 1:50 mRNA library. Hybridization and photo-  
2 crosslinking yielded mRNA-linker complexes of both libraries (Fig. 3A). These complexes  
3 were used as templates for cell-free protein synthesis and yielded mRNA display complexes  
4 (Fig. 3B).

5

#### 6 Selection of T26 sequence from binary model libraries

7 After the selection and subsequent processing to obtain enriched DNA on the surface of  
8 magnetic beads, cDNA of the original, enriched and leftover library was PCR-amplified by  
9 step 1 of the nested PCR, digested with *SphI* and analyzed by agarose gel electrophoresis, (Fig.  
10 3C). Band density analysis indicates enrichment factors of 5 and 30 for 1:4 and 1:50 libraries  
11 respectively.

12

#### 13 Generation of random libraries

14 The display of random libraries, LibQ (Gln position randomized by NNK codon) and  
15 Lib4 (positions -1,+1,+2,+3 from Gln randomized by NNK codon), started with the preparation  
16 of the DNA libraries from chemically synthesized ssDNA and their conversion into the  
17 corresponding mRNA libraries. mRNA synthesis at 30- $\mu\text{L}$  scale proceeded with the overall  
18 yield of 36  $\mu\text{g}$  for Lib4 mRNA library and 56  $\mu\text{g}$  for LibQ mRNA library. The formation of  
19 mRNA-linker complexes was confirmed for both libraries (Fig. 4A). Obtained mRNA-linker  
20 complexes were used for cell-free protein synthesis as templates and yielded mRNA display  
21 complexes (Fig. 4B).

22

#### 23 Selection of peptide sequences from random libraries

24 The selection and subsequent processing to obtain enriched DNA on the surface of  
25 magnetic beads proceeded in the same way as for the binary model libraries. cDNA of the

1 original, enriched and leftover library was PCR-amplified by step 1 of the nested PCR, and  
2 analyzed by agarose gel electrophoresis. Bands corresponding to the original and leftover  
3 libraries were observed (Fig. 5A). Since the corresponding bands were not observed for the  
4 enriched library, step 2 of the nested PCR was performed with different volumes of the PCR  
5 reaction mixture from step 1 as a template. After step 2, bands corresponding to the DNA of  
6 the enriched library were detected (Fig. 5B). We believe that due to the low amount of the  
7 reactive peptide sequences, an initial amount of cDNA enriched on the beads was too low to  
8 obtain a detectable amplification product after only one round of PCR. The enriched DNA was  
9 purified, modified for sequencing and subsequent read processing, and analyzed by NGS.

10

#### 11 *Analysis of the sequencing data from random libraries*

12 The raw NGS data were analyzed as described in Materials and Methods. After  
13 converting the processed DNA sequence data into the amino acid sequence data, the total  
14 number of sequences in both libraries, before and after selection, was calculated along with the  
15 number of identical sequences at each mutated amino acid position. Based on these numbers,  
16 the enrichment factor at each position was calculated. The enrichment factor of Gln from LibQ  
17 was approx. 3 (Fig. 6). The enrichment factor of the original T26 sequence from Lib4 was  
18 approx. 2. However, in Lib4, residues other than the original ones have also been enriched with  
19 similar enrichment factors. The data (Fig. 7) indicate that His and Gln were predominantly  
20 enriched in position -1, Ser and Cys at position +1, Tyr at position +2, and Val and Ile at  
21 position +3. Based on the enrichment data, the consensus sequence was defined as H/Q-Q-S/C-  
22 Y-V/I-D-P-W-M-L-D-H. The list of top 100 sequences enriched from Lib4 and ranked by the  
23 enrichment factor is given in Table S2. Among the top 100 enriched peptides, approx. 30%,  
24 including the first six sequences, contain Gln-Gln motif in positions -1 and 0, in accordance  
25 with the consensus sequence. In a few sequences, Gln-Gln motif is present at 0 and +1 positions.



1 Interestingly, selected sequences also show the presence of Cys, mostly at positions -1 and +1,  
2 around the reactive Gln. In the top 100 sequences, position +1 is mostly occupied by Tyr  
3 (23/100) followed by Cys, Val and Phe (12/100 for Cys and Val and 14/100 for Phe). Position  
4 +2 shows less preference for any particular residue, while at position +3, Val and Ile are  
5 dominant, as also observed in the consensus sequence.

6

### 7 Identification of the new potential protein targets of TG2

8 We used NCBI Blastp (<https://blast.ncbi.nlm.nih.gov/Blast.cgi>) search with the first  
9 seven residues of the enriched peptide sequences (T26, or combination of other enriched  
10 residues, QQCYIDP) as a query against a non-redundant sequence database of mouse and  
11 human proteins to verify if potential new protein targets of TG2 can be identified based on the  
12 presence of the query sequence motifs in their primary structure. Table 1 summarizes the search  
13 results. Both sequences have matching motifs in proteins with diverse functions. The  
14 localization of these potential targets also matches the one of TG2. Interestingly, both searches  
15 converge towards variable and junction regions of immunoglobulins, indicating a possible role  
16 of TG2 in the regulation of antibody function. To the best of our knowledge, this role of TG2  
17 has not been scientifically described yet.

18

## 19 **Discussion**

20 The platform for rapid screening and comprehensive analysis of TG substrate preference  
21 has been established and used for elucidation of the substrate profile of TG2. The platform  
22 relies on *in vitro* transcription and translation, which saves time and increases workable library  
23 size while reducing the risk of positive hit loss due to transformation efficiency or low  
24 expression level. For mRNA/cDNA display generation, we used the PURE system<sup>(26)</sup>, which  
25 contains only necessary components of the transcription/translation machinery in a highly pure

1 state, thus enabling the tight control of the expression conditions and eliminating the risk of  
2 proteolytic degradation. To facilitate the workflow, we used a puromycin linker for mRNA-  
3 protein chemical crosslinking developed by the Nemoto group<sup>(20)</sup> to ensure the fast and stable  
4 formation of the mRNA/cDNA display complexes with minimum risk to loss of genetic  
5 information during experimental processing.

6 We combined cDNA display technology with NGS to yield a system for the rapid  
7 activity-based evolution of proteins and peptides from large libraries in the shortest time with  
8 minimal demand for labor and, with full control over the expression conditions. The use of  
9 NGS increases the throughput and enables information-driven protein evolution since we can  
10 monitor the sequence enrichment after each screening cycle and gather broad information on  
11 sequence evolution.

12 Having in mind the great importance and abundance of TGs, we have chosen to develop  
13 a system to study their substrate profile as our first goal. A previous study reported about the  
14 preferred and specific substrate of TG2, T26 peptide, isolated from a random peptide library  
15 screened by phage display.<sup>(29)</sup> Follow-up study revealed that positions +2, +3, +4 play an  
16 important role in the reactivity of T26<sup>(10)</sup>, however comprehensive substrate profiling of TG2  
17 has not been performed yet. T26-derived peptide libraries were displayed in untagged form  
18 with high translation efficiency and complete solubility of mRNA/cDNA display complex. It  
19 is believed that the formation of the mRNA display complex itself helps the peptide stay soluble  
20 and available for the enzymatic reaction. The binary model libraries consisting of T26 and  
21 T26A peptides have been used to optimize the selection and post-selection treatment of the  
22 beads with an enriched cDNA display library. Our first enrichment results indicated that non-  
23 specific interactions between display complexes and the surface of magnetic beads during  
24 selection cause serious problems in the quality of enriched DNA. This was manifested as the  
25 presence of T26A DNA in the enriched sample alongside T26 DNA (data not shown). To solve

1 the problem, we used several strategies among which extensive washing with the buffer  
2 containing a high concentration of salt and detergent proved critical. In the end, after a single  
3 round of selection, we achieved five times enrichment of the T26 sequence from 1:4 and 30  
4 times enrichment from the 1:50 model library. This result demonstrates the applicability of our  
5 platform for screening and selection of TG substrate preference, and we, therefore, proceeded  
6 to screen random libraries under the same conditions.

7 Analysis of enriched DNA from LibQ indicated that Gln was predominantly enriched, as  
8 expected. Lower-than-expected enrichment factor for Gln is believed to be the consequence of  
9 performing a single selection round, and persistence of non-specifically enriched peptide  
10 sequences. However, since Gln was the only enriched sequence, with all other sequences  
11 having enrichment factors around 1 or below, we did not consider this an issue. As for the Lib4,  
12 the sequence corresponding to the residues of T26 peptide was enriched at all positions, in  
13 addition to the new alternative sequences at positions -1, +1, and +3. At position -1, the T26  
14 residue, His, was enriched alongside Gln. Although the two residues are of a different chemical  
15 nature, other studies have also found the Gln-Gln and Gln-Gln-Gln motif in the preferred  
16 sequences of TG2<sup>(13)</sup>, as well as microbial TG<sup>(16)</sup>. These motifs are also present in natural  
17 protein targets of TG2, such as substance P, crystallin, and fibronectin. Asp, Glu, and Lys were  
18 the least preferred residues at position -1. A negative charge of Asp and Glu could lead to  
19 unfavorable interactions with the residues of the TG2 substrate-binding site. Lys could become  
20 acyl acceptor of the neighboring Gln, which would lead to self-cross-linking of the peptide.  
21 Thus, Lys is also expected to be among the least preferred residues at this position. At position  
22 +1, the T26 residue, Ser, was enriched alongside Cys. The two residues have a similar shape,  
23 size and chemical nature, thus it does not surprise that the two sequences share the similar  
24 preference of the enzyme. Interestingly, the presence of Cys in the peptide sequence did not  
25 prove harmful to the enzyme's active site Cys, possibly due to the reducing environment of the

1 selection reaction. This time as well, Lys was among the least preferred residues, likely for the  
2 same reason as in position -1. Besides Lys, among the least preferred residues were also Pro  
3 and Glu. At position +2, the T26 residue, Tyr, was preferably enriched. Meanwhile, the least  
4 preferred residues were Phe, Leu and Pro. This result implies that the hydroxyl group of Tyr is  
5 critical for the favorable enzyme-substrate interaction. At position +3, the T26 residue, Val,  
6 was enriched alongside Ile. The two enriched amino acids have a similar size and chemical  
7 nature, which indicates that small hydrophobic residues are preferred at this position. In  
8 contrast, the least preferred residues were charged Lys, Asp and Glu.

9 Besides the consensus sequence, we have also analyzed the top 100 enriched peptides  
10 ranked by the enrichment factor. Their sequences are well aligned with the consensus sequence  
11 however, show some differences. The top peptides show predominantly Gln at position -1  
12 (28/100). The greatest difference between the consensus sequence and the sequences of the top  
13 100 enriched peptides are the abundance of Tyr at position +1 (23/100 peptides), and the rather  
14 broad presence of hydrophobic and basic residues at position +2. This could be an indicator of  
15 the broader specificity of the enzyme at these two positions. Evidently, Tyr at position +1 or  
16 +2 is desired. Position +3 is dominated by Val and Ile, in the consensus sequence and in the  
17 sequence of top 100 enriched peptides. It should be noted that among the top 100 enriched  
18 peptides we have found seven sequences without Gln. Their presence in the original library  
19 could be explained by the errors in the chemical synthesis of ssDNA library fragments. Upon  
20 inspection of their sequences, we noticed that these peptides contain His and Trp near the N-  
21 terminus, which is a characteristic of streptavidin-binding peptides, meaning that they could  
22 bind to streptavidin and get falsely enriched during the selection. This phenomenon has been  
23 described before <sup>(29)</sup>. In addition, some sequences in the top 100 list lack start codon, and these  
24 could only be explained by non-specific enrichment (no peptide expression but the mRNA-  
25 linker-cDNA complex gets bound to the streptavidin beads non-specifically).

1           Finally, the results of our Blastp search suggest that our platform can also be used for the  
2 identification of possible novel TG targets.

3

#### 4 **Conclusion**

5           The cDNA display/NGS platform for the selection of TG peptide substrates and analysis  
6 of TG substrate profile has been established. This *in vitro* system enables rapid screening and  
7 selection of preferred TG substrate peptides from random libraries based on enzymatic activity,  
8 resulting in enrichment of the selected sequences on the surface of the magnetic microbeads,  
9 from where they can be recovered and analyzed. Availability of the NGS can shorten the  
10 selection to only one or a few rounds, based on which we can deduce the substrate preference  
11 by proper data processing and analysis. We plan to use this system to screen for the substrate  
12 preference of other mammalian TGs and design appropriate peptide probes for detection and  
13 analysis of TG activity. Our hope is that the enriched sequence data can be also used to identify  
14 novel natural TG targets and promote TG-related research. The platform is further expected to  
15 become an indispensable tool for screening enzyme libraries during enzyme engineering.

16

#### 17 **Materials and Methods**

##### 18 Materials

19           Oligonucleotides were synthesized by Greiner Bio-One, Japan, or Integrated DNA  
20 Technologies, Singapore, or by Eurofins, Japan. Restriction enzymes, DNA polymerases  
21 (Pyrobest and PrimeStar), and Recombinant RNase Inhibitor were purchased from Takara Bio  
22 Inc., Japan. Recombinant Mouse Transglutaminase 2 was from Novus Biologicals, USA.  
23 Components of *in vitro* cell-free protein synthesis kit, PUREflex, were provided by  
24 GeneFrontier Corporation, Japan. Puromycin cnv-K and SBP linkers were obtained from  
25 Epsilon Molecular Engineering Inc., Japan.

1

2 Preparation of T26 DNA constructs

3 Plasmids with the T26 gene constructs and their corresponding inactive (non-substrate)  
4 versions were prepared as described in *Supporting material*, together with detailed information  
5 on the constructs' DNA sequences.

6

7 Preparation of DNA templates for cDNA display

8 For the binary model libraries, genes of T26 constructs were amplified by PCR using the  
9 corresponding plasmids as templates, and New Left and cnvK\_New Ytag primers listed in  
10 Table S3 (Fig. S3A). Amplified PCR products were column-purified (QIAquick PCR  
11 Purification Kit, QIAGEN, Germany) and their concentration was evaluated by NanoDrop  
12 (NanoDrop, USA). Purified DNA was used for *in vitro* transcription.

13 For the preparation of random libraries, LibQ and Lib4, 61-basepair ssDNA fragments  
14 consisting of Gln replaced by degenerate NNK codon, and amino acids at positions -1, +1, +2,  
15 +3 from Gln replaced by degenerate NNK codon respectively, were custom ordered from  
16 Integrated DNA Technologies, Singapore. The scheme of the library preparation is given in  
17 Fig. S3B. dsDNA fragments were generated in the reaction with Klenow fragment (Takara-  
18 Bio, Japan) and a single primer, number 16 (Table S3). dsDNA fragments were inserted into  
19 PCR-amplified (primers 17-18 in Table S3) and purified pRSET vector fragment by Gibson  
20 Assembly (NEB, USA) to add sequence parts necessary for cDNA display generation to the  
21 DNA library. Assembled products were PCR amplified using New Left and cnvK\_New Ytag  
22 primers, column-purified and used for *in vitro* transcription to obtain LibQ and Lib4 mRNA  
23 libraries.

24

25 Preparation of cDNA display

1 mRNA pools were prepared by *in vitro* transcription using the RiboMAX Large Scale  
2 RNA Production System-T7 (Promega, USA), and prepared DNA templates. For binary model  
3 libraries, DNA containing the original T26 sequence and non-substrate sequence (T26A) was  
4 mixed in designated molar ratios and used as a template for the synthesis of the mRNA library.  
5 For random libraries, prepared dsDNA corresponding to LibQ and Lib4 was used as the  
6 template. The reaction mixtures were incubated at 37°C for 2h. This was followed by  
7 purification of the synthesized mRNA, including the on-column DNA digestion, with the  
8 NucleoSpin RNA kit (Takara-Bio, Japan). The purity and concentration of RNA were checked  
9 by NanoDrop and Urea PAGE electrophoresis. Twenty pmol of the synthesized mRNA  
10 libraries were hybridized and photo-crosslinked to the *cnv-K* linker (Fig. S4A), as done  
11 before.<sup>(22; 11)</sup> Six  $\mu$ L of the obtained reaction mixture was used as a template for *in vitro*  
12 translation using the reconstituted *E. coli*-based cell-free protein synthesis system (PURE $_{ef}$ ref,  
13 GeneFrontier, Japan) in a 25- $\mu$ L scale. The reaction mixture was incubated at 37°C for 30 min,  
14 followed by the addition of EDTA (20 mM) and incubation at 37°C for 5 min to release the  
15 ribosomes. In the following, the reactions were centrifuged, and supernatants containing  
16 mRNA display complexes (mRNA-linker-protein complex) were collected for purification.  
17 Purification was carried out by immobilization of mRNA display molecules to streptavidin-  
18 coated magnetic microbeads (Streptavidin MyOne C1, Thermo Fisher, USA) via biotin of the  
19 puromycin linker. After immobilization, the beads were washed with binding buffer (10 mM  
20 Tris-HCl, pH 8.0, 1mM EDTA, 1M NaCl, 0.1% Tween 20) and 1X ReverTra Ace buffer.  
21 Reverse transcription reaction was then carried out to convert mRNA to cDNA using the  
22 ReverTra Ace (Toyobo, Japan) reverse transcriptase at 42°C for 30 min on a rotator. Beads  
23 were then washed with selection buffer (50 mM Tris-HCl, pH 7.4, 0.5M NaCl, 1mM EDTA,  
24 0.05% Tween 20), and treated with RNase T1 for 15 min at 37°C on a rotator to release formed  
25 cDNA display (mRNA-cDNA-linker-protein complex) by digestion of the RNase T1

1 recognition site included in the linker structure. Supernatant after RNase T1 treatment  
2 containing the cDNA display molecules was used for subsequent selection.

3

#### 4 *Selection of transglutaminase substrate peptides*

5 The selection was performed on a 100- $\mu$ L scale, using 30  $\mu$ L of cDNA display solution  
6 per reaction. In addition, each reaction mixture contained 32 mM pentylamine-biotin (Thermo  
7 Fisher, USA) as acyl acceptor substrate, 10 mM Tris-HCl, pH 8.0, 15 mM CaCl<sub>2</sub>, 7.5 mM DTT  
8 and 0.01 mg/mL recombinant mouse TG2. The reaction was incubated at 37°C for 90 min,  
9 followed by ultrafiltration with a 3 kDa cut-off membrane to remove the unreacted  
10 pentylamine-biotin. In the following, formed covalent complexes between cDNA display  
11 molecules and pentylamine-biotin were pulled from the mixture by immobilization to  
12 streptavidin-coated magnetic microbeads (20  $\mu$ L; Streptavidin MyOne C1, Thermo Fisher,  
13 USA). After immobilization, the beads were separated from the supernatant, washed three  
14 times with each, 1 mL of the selection buffer v4 (50mM Tris-HCl, pH 7.4, 0.5M NaCl, 1mM  
15 EDTA, 0.7% Tween 20) and 100  $\mu$ L of TE buffer, followed by resuspension in TE buffer.

16

#### 17 *Detection of enriched DNA in model libraries*

18 Original cDNA library, beads suspension (enriched library) and supernatant fractions  
19 (leftover library) were used for PCR amplification of DNA using the primers Nested\_Fw1 and  
20 Nested\_Rv1 (Table S3, Fig. S5). At the Q2A mutation site, T26A DNA contains a unique  
21 restriction site for *SphI*, which T26 does not have. This property was used to distinguish  
22 between PCR-amplified T26 and T26A DNA. Briefly, 5  $\mu$ L of PCR product was subjected to  
23 restriction digestion with *SphI* and analyzed by agarose gel electrophoresis. The band pattern  
24 was compared with that of digested T26 and T26A original DNA to identify the enriched DNA.

25



1 *Analysis of the enriched DNA from LibQ and Lib4 libraries*

2 Original cDNA library, enriched library and leftover library were used for PCR  
3 amplification using the primers Nested\_Fw1 and Nested\_Rv1 (Table S3, Fig. S5) to check for  
4 the presence of expected DNA band in each of the fractions. For the enriched library, a portion  
5 of the PCR mixture after the first nested PCR was used as a template for the second nested  
6 PCR with Nested\_Fw2 and Nested\_Rv2 primers (Table S3, Fig. S5). Amplified DNA was  
7 analyzed by electrophoresis. DNA amplified from the original and enriched library was  
8 purified and prepared for NGS analysis.

9 To prepare the original and enriched libraries for sequencing, corresponding DNA was  
10 PCR amplified with the following set of primers: NGS prep (T26)\_Fw and Nested\_Rv1 for  
11 Lib4 before and after selection, NGS prep (T26, randomQ, after) and Nested\_Rv1 for LibQ  
12 after selection, and NGS prep (T26, randomQ, before) and Nested\_Rv1 for LibQ before the  
13 selection. Since we analyzed the original and enriched LibQ DNA as a single sequencing  
14 sample, this PCR amplification step also introduced specific 10 bp tags upstream of the T26  
15 gene to distinguish the sequence reads belonging to the original library from the ones belonging  
16 to the enriched library. After the PCR amplification, DNA was column-purified. Original and  
17 enriched LibQ DNA was mixed in a 1:1 molar ratio to make one sample for analysis, while  
18 original and enriched Lib4 DNA were analyzed as separate two samples. The samples were  
19 further prepared and analyzed by pair-end next-generation sequencing (Illumina, NextSeq550)  
20 carried out at the Center for Gene Research of Nagoya University.

21

22 *Processing of the NGS data*

23 At first, data quality was assessed by Seqkit<sup>(25)</sup>. Quality scores, Q20(%) and Q30(%)  
24 were between 93 and 95%, which indicates a low probability of incorrect base identification in  
25 our data sets. Trimmomatic<sup>(3)</sup> was used to remove contaminating adapter sequences. Then,

1 Seqkit was applied for quality filtering with Q set to 25. After quality filtering, 82-83% of total  
2 sequences passed the evaluation and were further used. Fastq files were then converted to fasta  
3 format, and only forward sequence reads were retained. This is because all of the mutation sites  
4 are within the 81bp forward read of the total 160-170bp long DNA. Reads from the sample  
5 containing the tagged sequences from LibQ were processed to separate the reads corresponding  
6 to the library before and after selection. The statistics of sequence files were monitored after  
7 each processing step to ensure sufficient data are retained for the next step. Finally, all bases  
8 upstream of the peptide sequence were removed from the reads and the remaining DNA  
9 sequence was converted into the amino acid sequence and analyzed by Biopython<sup>(4)</sup>. For Lib4,  
10 the final filtering was applied to exclude sequences which do not contain Gln at the second  
11 position, since those sequences are not planed according to the library design but could  
12 accidentally be present as a result of chemical synthesis of the DNA library and subsequent  
13 carryover. The rank list of top 100 enriched peptides further includes filtering of the sequences  
14 that show less than 100 reads after the selection, as these were not considered significant. The  
15 ranking was made based on the value of the enrichment factor (from highest to lowest).

16

## 17 **Acknowledgment**

18 This work was supported by Grant-in-Aid for Early-Career scientists from Japan Society for  
19 the Promotion of Science awarded to J.D. (18K14387). The authors are thankful to Dr. Takashi  
20 Kanamori from Gene Frontier, Japan for providing PURE*flex* components, and to Dr. Bo Zhu  
21 from Tokyo Institute of Technology for valuable discussions.

22

## 23 **References:**

- 1 1. Baggio R, Burgstaller P, Hale SP, Putney AR, Lane M, Lipovsek D, Wright MC, Roberts  
2 RW, Liu R, Szostak JW, Wagner RW (2002) Identification of epitope-like consensus motifs  
3 using mRNA display. *J Mol Recognit* 15:126-134.
- 4 2. Barrick JE, Takahashi TT, Balakin A, Roberts RW (2001) Selection of RNA-binding  
5 peptides using mRNA-peptide fusions. *Methods (San Diego, Calif)* 23:287-293.
- 6 3. Bolger AM, Lohse M, Usadel B (2014) Trimmomatic: a flexible trimmer for Illumina  
7 sequence data. *Bioinformatics* 30:2114-2120.
- 8 4. Chapman B, Chang J (2000) Biopython: Python tools for computational biology. *SIGBIO*  
9 *News* 20:15–19.
- 10 5. Eckert RL, Kaartinen MT, Nurminskaya M, Belkin AM, Colak G, Johnson GVW, Mehta K  
11 (2014) Transglutaminase regulation of cell function. *Physiol Rev* 94:383-417.
- 12 6. Fleming SR, Himes PM, Ghodge SV, Goto Y, Suga H, Bowers AA (2020) Exploring the  
13 post-translational enzymology of PaaA by mRNA display. *J Am Chem Soc* 142:5024-5028.
- 14 7. Fukui M, Kuramoto K, Yamasaki R, Shimizu Y, Itoh M, Kawamoto T, Hitomi K (2013)  
15 Identification of a highly reactive substrate peptide for transglutaminase 6 and its use in  
16 detecting transglutaminase activity in the skin epidermis. *FEBS J* 280:1420-1429.
- 17 8. Griffin M, Casadio R, Bergamini CM (2002) Transglutaminases: Nature's biological glues.  
18 *Biochem J* 368:377-396.
- 19 9. Gundemir S, Colak G, Tucholski J, Johnson GVW (2012) Transglutaminase 2: A molecular  
20 Swiss army knife. *Biochim Biophys Acta* 1823:406-419.
- 21 10. Hitomi K, Kitamura M, Sugimura Y (2009) Preferred substrate sequences for  
22 transglutaminase 2: Screening using a phage-displayed peptide library. *Amino Acids* 36:619-  
23 624.
- 24 11. Jayathilake C, Terai T, Nemoto N (2019) cDNA display mediated Immuno-PCR (cD-  
25 IPCR): A novel PCR-based antigen detection method. *Bio-protocol* 9:e3457.

- 1 12. Ju W, Valencia CA, Pang H, Ke Y, Gao W, Dong B, Liu R (2007) Proteome-wide  
2 identification of family member-specific natural substrate repertoire of caspases. *Proc Natl*  
3 *Acad Sci* 104:14294.
- 4 13. Keresztessy Z, Csósz É, Hársfalvi J, Csomós K, Gray J, Lightowlers RN, Lakey JH,  
5 Balajthy Z, Fésüs L (2006) Phage display selection of efficient glutamine-donor substrate  
6 peptides for transglutaminase 2. *Protein Sci* 15:2466-2480.
- 7 14. Kozlov IA, Thomsen ER, Munchel SE, Villegas P, Capek P, Gower AJ, K. Pond SJ, Chudin  
8 E, Chee MS (2012) A highly scalable peptide-based assay system for proteomics. *PLOS ONE*  
9 7:e37441.
- 10 15. Kumachi S, Husimi Y, Nemoto N (2016) An RNA binding peptide consisting of four types  
11 of amino acid by *in vitro* selection using cDNA display. *ACS Omega* 1:52-57.
- 12 16. Lee J-H, Song C, Kim D-H, Park I-H, Lee S-G, Lee Y-S, Kim B-G (2013) Glutamine (Q)-  
13 peptide screening for transglutaminase reaction using mRNA display. *Biotechnol Bioeng*  
14 110:353-362.
- 15 17. Li S, Millward S, Roberts R (2002) *In vitro* selection of mRNA display libraries containing  
16 an unnatural amino acid. *J Am Chem Soc* 124:9972-9973.
- 17 18. Lorand L, Graham RM (2003) Transglutaminases: crosslinking enzymes with pleiotropic  
18 functions. *Nat Rev Mol Cell Biol* 4:140-156.
- 19 19. Mižíková I, Pfeffer T, Nardiello C, Surate Solaligue DE, Steenbock H, Tatsukawa H, Silva  
20 DM, Vadász I, Herold S, Pease RJ, Iismaa SE, Hitomi K, Seeger W, Brinckmann J, Morty RE  
21 (2018) Targeting transglutaminase 2 partially restores extracellular matrix structure but not  
22 alveolar architecture in experimental bronchopulmonary dysplasia. *FEBS J* 285:3056-3076.
- 23 20. Mochizuki Y, Suzuki T, Fujimoto K, Nemoto N (2015) A versatile puromycin-linker using  
24 cnvK for high-throughput *in vitro* selection by cDNA display. *J Biotechnol* 212:174-180.

- 1 21. Myneni VD, Hitomi K, Kaartinen MT (2014) Factor XIII-A transglutaminase acts as a  
2 switch between preadipocyte proliferation and differentiation. *Blood* 124:1344-1353.
- 3 22. Nemoto N, Kumachi S, Arai H. *In vitro* selection of single-domain antibody (VHH) using  
4 cDNA display. In: Nevoltris D, Chames P, Eds. (2018) *Antibody Engineering: Methods and*  
5 *Protocols*. Springer New York, New York, NY, pp. 269-285.
- 6 23. Nemoto N, Miyamoto-Sato E, Husimi Y, Yanagawa H (1997) *In vitro* virus: Bonding of  
7 mRNA bearing puromycin at the 3'-terminal end to the C-terminal end of its encoded protein  
8 on the ribosome *in vitro*. *FEBS Lett* 414:405-408.
- 9 24. Roberts RW, Szostak JW (1997) RNA-peptide fusions for the *in vitro* selection of peptides  
10 and proteins. *Proc Natl Acad Sci* 94:12297.
- 11 25. Shen W, Le S, Li Y, Hu F (2016) SeqKit: A cross-platform and ultrafast toolkit for fasta/q  
12 file manipulation. *PLOS ONE* 11:e0163962.
- 13 26. Shimizu Y, Inoue A, Tomari Y, Suzuki T, Yokogawa T, Nishikawa K, Ueda T (2001) Cell-  
14 free translation reconstituted with purified components. *Nature Biotechnol* 19:751-755.
- 15 27. Shiryayev SA, Aleshin AE, Muranaka N, Kukreja M, Routenberg DA, Remacle AG,  
16 Liddington RC, Cieplak P, Kozlov IA, Strongin AY (2014) Structural and functional diversity  
17 of metalloproteinases encoded by the *Bacteroides fragilis* pathogenicity island. *FEBS J*  
18 281:2487-2502.
- 19 28. Sugimura Y, Hosono M, Kitamura M, Tsuda T, Yamanishi K, Maki M, Hitomi K (2008)  
20 Identification of preferred substrate sequences for transglutaminase 1--development of a novel  
21 peptide that can efficiently detect cross-linking enzyme activity in the skin. *FEBS J* 275:5667-  
22 5677.
- 23 29. Sugimura Y, Hosono M, Wada F, Yoshimura T, Maki M, Hitomi K (2006) Screening for  
24 the preferred substrate sequence of transglutaminase using a phage-displayed peptide library:

- 1 Identification of peptide substrates for TGase 2 and Factor XIIIa\*. J Biol Chem 281:17699-  
2 17706.
- 3 30. Tatsukawa H, Furutani Y, Hitomi K, Kojima S (2016) Transglutaminase 2 has opposing  
4 roles in the regulation of cellular functions as well as cell growth and death. Cell Death &  
5 Disease 7:e2244-e2244.
- 6 31. Terai T, Anzai H, Nemoto N (2019) Selection of peptides that associate with dye-  
7 conjugated solid surfaces in a pH-dependent manner using cDNA display. ACS Omega  
8 4:7378-7384.
- 9 32. Vinogradov AA, Shimomura M, Kano N, Goto Y, Onaka H, Suga H (2020) Promiscuous  
10 enzymes cooperate at the substrate level en route to Lactazole A. J Am Chem Soc 142:13886-  
11 13897.
- 12 33. Yamane A, Fukui M, Sugimura Y, Itoh M, Alea MP, Thomas V, El Alaoui S, Akiyama M,  
13 Hitomi K (2010) Identification of a preferred substrate peptide for transglutaminase 3 and  
14 detection of *in situ* activity in skin and hair follicles. FEBS J 277:3564-3574.  
15

1 **Figures**

2

3

4

5

6

7

8

9

10

11

12

13

14

15

16

17

18

19

20 Figure 1. Outline of the cDNA display platform for screening and selection of preferred TG

21 peptide substrate. During the selection step, glutamine of the reactive displayed peptides is

22 biotinylated in TG-catalyzed crosslinking reaction between the amino group of the

23 pentylamine-biotin and side-chain of glutamine (as indicated by the small squared image and

24 illustration of the enriched display). Biotinylated display complexes are collected by the

25 streptavidin-coated magnetic beads (colored gray).

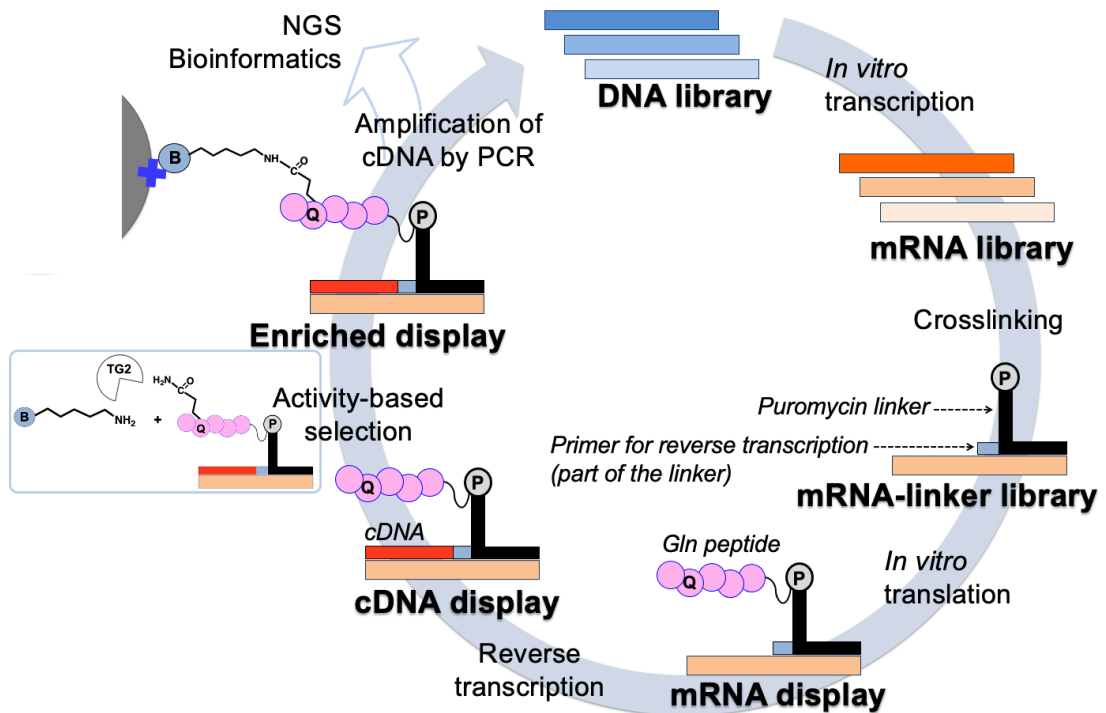

1  
2  
3  
4  
5  
6  
7  
8  
9  
10  
11  
12  
13  
14  
15  
16  
17  
18  
19  
20  
21

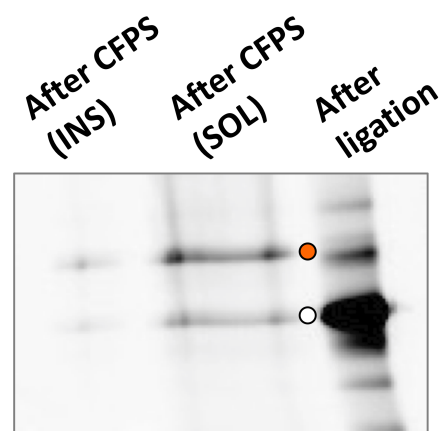

22 Figure 2. Urea SDS-PAGE gel of the ligation product and mRNA display complex of the  
23 untagged T26 construct visualized using fluorescence imager with FITC filter. Orange circles  
24 indicate the position of mRNA display complex and white circles indicate the position of the  
25 ligation product.



1  
2  
3  
4  
5  
6  
7  
8  
9  
10  
11  
12  
13  
14  
15  
16  
17  
18  
19  
20  
21  
22  
23  
24  
25

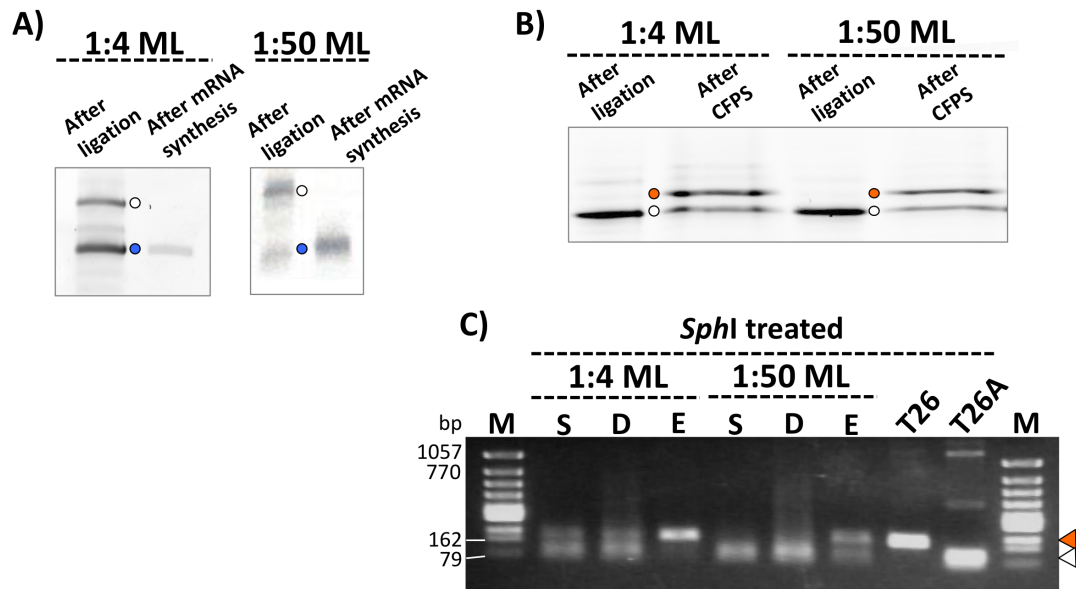

Figure 3. Preparation of binary model libraries and selection of T26. (A) Urea PAGE of generated mRNA libraries and corresponding ligation products detected with fluorescence imager after staining with SYBRGold. Blue circles indicate the position of mRNA and white circles indicate the position of ligation products. (B) Urea SDS-PAGE of ligation products and mRNA display complexes detected by fluorescence imager under the FITC filter. Orange circles indicate the position of mRNA display complexes and white circles indicate the position of ligation products. (C) Electrophoresis of amplified and *SphI*-treated DNA samples of the original (D), selected (E) and leftover (S) library. Orange triangles indicate the position of the T26 DNA band and white triangles indicate the position of the T26A DNA band.

1  
2  
3  
4  
5  
6  
7  
8  
9  
10  
11  
12  
13  
14  
15  
16  
17  
18  
19  
20  
21  
22  
23  
24  
25

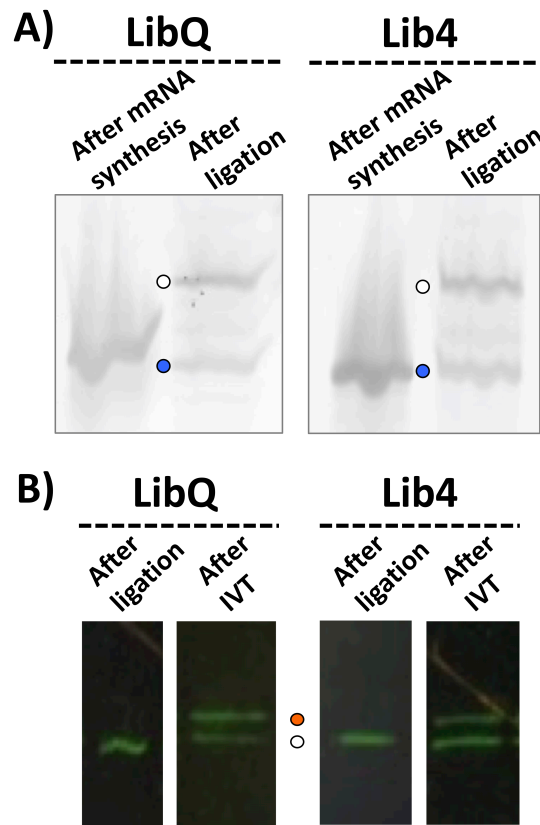

Figure 4. Preparation of random libraries. (A) Urea PAGE of generated mRNA libraries and corresponding ligation products detected with fluorescence imager after staining with SYBRGold. Blue circles indicate the position of mRNA and white circles indicate the position of ligation products. (B) Urea SDS-PAGE of ligation products and mRNA display complexes detected by fluorescence imager under the FITC filter. Orange circles indicate the position of mRNA display complexes and white circles indicate the position of ligation products.

1  
2  
3  
4  
5  
6  
7  
8  
9  
10  
11  
12  
13  
14  
15  
16  
17  
18  
19  
20  
21  
22  
23  
24  
25

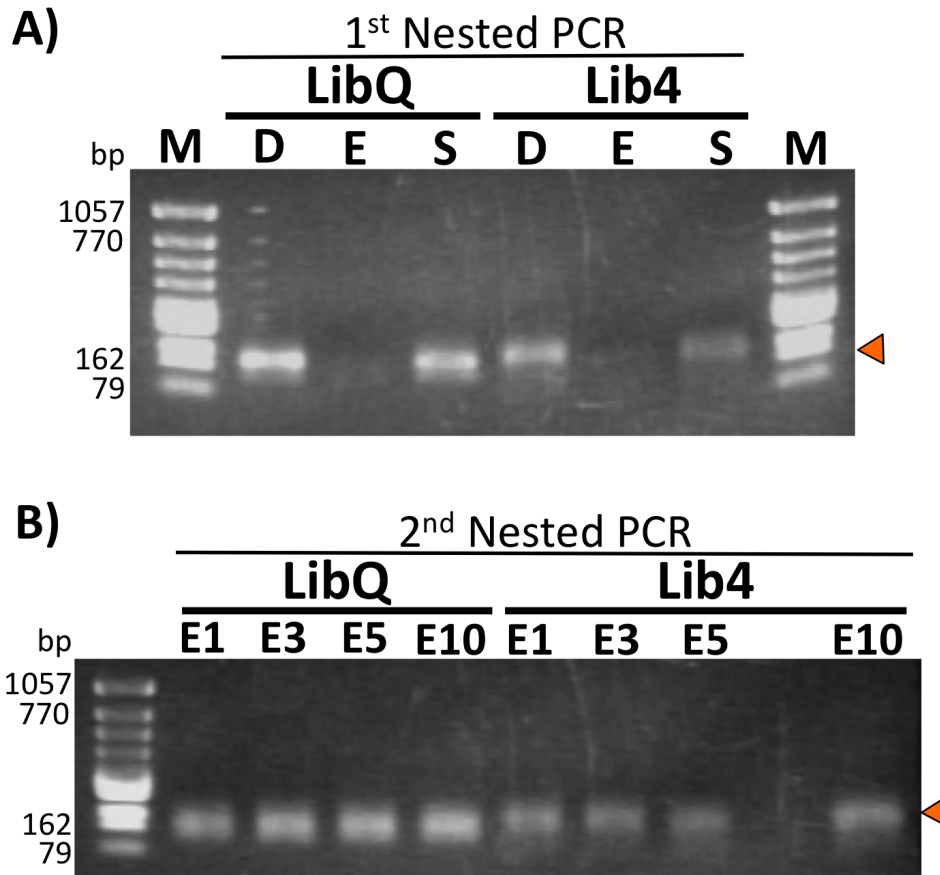

Figure 5. (A) Electrophoresis after PCR amplification (first step of the nested PCR) of DNA from the original (D), selected (E) and leftover (S) LibQ and Lib4 libraries. (B) Electrophoresis after PCR amplification (second step of the nested PCR) of the selected (E) LibQ and Lib4 libraries. Lanes E1, E3, E5 and E10 show the bands of the PCR products after the second step of the nested PCR when 1, 3, 5, and 10  $\mu$ L of the first PCR reaction was used as a template respectively. The orange triangle indicates the position of amplified DNA bands.

1  
2  
3  
4  
5  
6  
7  
8  
9  
10  
11  
12  
13  
14  
15  
16  
17  
18  
19  
20  
21  
22  
23  
24  
25

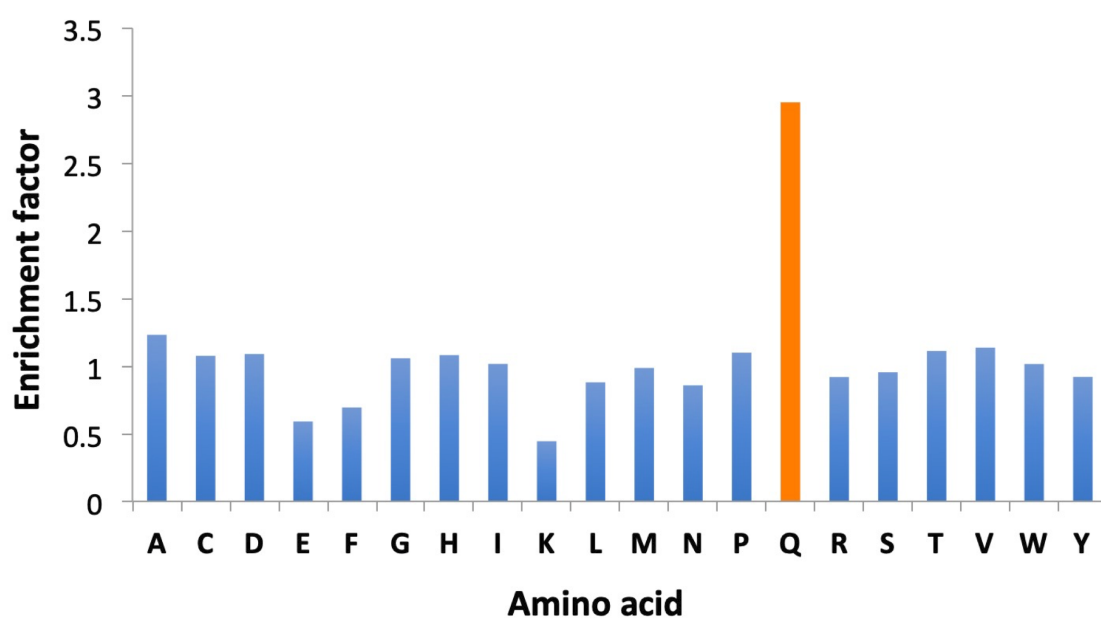

Figure 6. The enrichment factor of each amino acid residue at the randomized Gln position of T26 in LibQ.

1  
2  
3  
4  
5  
6  
7  
8  
9  
10  
11  
12  
13  
14  
15  
16  
17  
18  
19  
20  
21  
22  
23

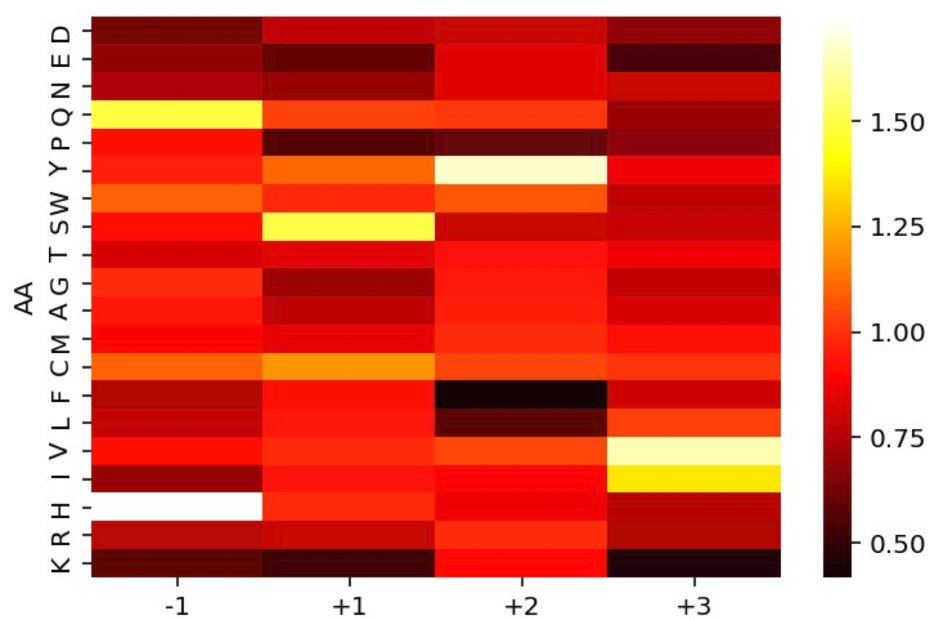

24 Figure 7. The heatmap showing the color-coded enrichment factor of each amino acid residue  
25 at four randomized positions (-1, +1, +2, +3) of T26 in Lib4.

1 **Tables**

2 **Table 1.** Summarized results of the Blastp search with two query sequences, consisting of the  
3 first 7 a.a. residues of the enriched peptides against the human and mouse proteins. Only the  
4 matches with 6-7 residues including one residue mismatch, or 5 residues without a mismatch  
5 are given. If aligned amino acid residues are not identical but are similar in size and nature,  
6 this was not considered a mismatch.

7

| Query | T26 (HQSYVDP)                                                                                                                               | QQCYIDP                                                                                                                                                                                                                                                                     |
|-------|---------------------------------------------------------------------------------------------------------------------------------------------|-----------------------------------------------------------------------------------------------------------------------------------------------------------------------------------------------------------------------------------------------------------------------------|
| Match | Ig light chain junction region<br>Ig heavy chain junction region<br>Ig kappa light chain variable region<br>Ankyrin-3 isoforms<br>mCG144990 | Zinc transporters (solute carrier 30 family)<br>Ig kappa light chain variable region<br>Ig light chain junction region<br>Heparanase 2 and 3<br>Coatomer subunit beta<br>Telomere length regulation protein TEL2 homologs<br>Gamma-glutamyl hydrolase precursor<br>mCG12390 |

8

9

10
